# Supplementary material for: Penicillium janthinellum NCIM1366 shows improved biomass hydrolysis and a larger number of CAZymes with higher induction levels over Trichoderma reesei RUT-C30
Source: Research Square preprint supplement (doi:10.21203/rs.3.rs-53399/v2), 2020-11-17
Supplement: Supplementary file 1 [file 716cc71eb3d79efc10024edd.xlsx]

## Sheet: PJG vs PJC _proteinlist
Accession	Peptide count	Unique peptides	Max fold change	Highest mean condition	Lowest mean condition	Mass	Description	Normalized Abundance Pj-Cel 01_20200102_TRC_01	Normalized Abundance Pj-Cel 02_20200102_TRC_02	Normalized Abundance Pj-Glu 01_20200102_TRG_01	Normalized Abundance Pj-Glu 02_20200102_TRG_02
S7ZRD6;C9EI49;F6L7A1;U3N6C8;A0A0S2N073;B2LSE2;B3GS64	7	3	Infinity	PJC	PJG	58144.2	Glucanase OS=Penicillium oxalicum (strain 114-2 / CGMCC 5302) OX=933388 GN=PDE_07945 PE=3 SV=1	28347.4	28308.7	0	0
A0A0F7TXT6;A0A1Q5ULE5;A0A1S9RDR1;B8Q961;A0A0A2JSU0	4	4	Infinity	PJC	PJG	45476	Putative Endo-1_4-beta-D-glucanase OS=Penicillium brasilianum OX=104259 GN=PMG11_10007 PE=3 SV=1	22909.9	22991.3	0	0
A0A1V6YI05	2	1	Infinity	PJC	PJG	104467	Uncharacterized protein OS=Penicillium nalgiovense OX=60175 GN=PENNAL_c0020G04807 PE=4 SV=1	2799.01	2809.33	0	0
A0A1Q5TDS9	2	2	110464	PJC	PJG	180216	BTB/POZ domain-containing protein 1 OS=Penicillium subrubescens OX=1316194 GN=PENSUB_9457 PE=4 SV=1	3472.87	3443.37	0.0412711	0.02134
A0A1Q5T9M4	2	2	Infinity	PJC	PJG	50197.7	Uncharacterized protein OS=Penicillium subrubescens OX=1316194 GN=PENSUB_10425 PE=4 SV=1	8813.01	9055.11	0	0
A0A135LPM4	3	2	4166.36	PJC	PJG	120760	Cytochrome P450 OS=Penicillium patulum OX=5078 GN=PGRI_064880 PE=4 SV=1	84347.7	87267.3	20.4808	20.7098
A0A093UWI5;A0A093UXI4;A0A093VD53;B6QTV9;A0A0F7U1Y3;A0A1Q5U5B4;A0A1S9RYQ3;A0A2H3IJD6;B8MP33;S8B4L4	3	2	20155	PJC	PJG	107073	Sodium/potassium-transporting ATPase subunit alpha-1 OS=Talaromyces marneffei PM1 OX=1077442 GN=GQ26_0270740 PE=3 SV=1	1940.39	1963.29	0.113854	0.0798287
A0A1Q5UFZ3;A0A1V6T7J7	6	4	2.3968e+06	PJC	PJG	48514.7	Glucanase OS=Penicillium subrubescens OX=1316194 GN=PENSUB_3088 PE=3 SV=1	8475.35	9007.99	0.00441443	0.00288001
A0A1Q5UH86;A0A1V6TMY4;W6R7Z3;A0A0G2UM08;A0A0G4PQY1;A0A167SNQ6;A0A1V6TE85;A0A1V6V332;A0A1V6YTI1;B6HE71;Q5S1P9;B8MK69	14	4	28184.2	PJC	PJG	57684.6	Glucanase OS=Penicillium subrubescens OX=1316194 GN=PENSUB_2616 PE=3 SV=1	10045.3	10486.1	0.394547	0.333927
T1WI91	2	1	1.20958e+06	PJC	PJG	60545.9	Glucanase OS=Penicillium granulatum OX=395885 GN=cbh1 PE=2 SV=1	733.129	690.869	0.000712457	0.000464812
A0A0U1M963	1	1	Infinity	PJG	PJC	120442	Valyl-tRNA synthetase OS=Talaromyces islandicus OX=28573 GN=PISL3812_09153 PE=3 SV=1	0	0	107.711	103.039
A0A1Q5UI44;A0A0A2JRC1;A0A0A2L5I7;A0A0G4NZZ9;A0A0M8NPY9;A0A1V6QYU6;A0A1V6SRY1;K9G2R5;K9GUL5	2	1	Infinity	PJC	PJG	42252.4	Glucanase OS=Penicillium subrubescens OX=1316194 GN=PENSUB_2291 PE=3 SV=1	11186.8	12302.2	0	0
A0A0F7KIJ2;A0A1Q5UIL1;O94221	2	2	Infinity	PJC	PJG	48172.8	Alpha-galactosidase OS=Talaromyces purpureogenus OX=1266744 PE=3 SV=1	4917.55	5427.71	0	0
A0A0A2L7T5;A0A1V6RZ76	1	1	Infinity	PJG	PJC	82419.2	Dynamin OS=Penicillium italicum OX=40296 GN=PITC_010890 PE=3 SV=1	0	0	77.0876	72.8216
A0A088DLG0	8	1	20103	PJC	PJG	57925.9	Glucanase (Fragment) OS=Penicillium canescens OX=5083 GN=cbhI PE=3 SV=1	2466.59	2747.35	0.141124	0.118237
A0A1V6P1A2	2	2	762.836	PJC	PJG	92421.5	DRMBL domain-containing protein OS=Penicillium decumbens OX=69771 GN=PENDEC_c024G04321 PE=4 SV=1	3057.4	3034.33	4.17308	3.81256
A0A0U1LLY3	1	1	Infinity	PJC	PJG	90355	Uncharacterized protein OS=Talaromyces islandicus OX=28573 GN=PISL3812_01370 PE=4 SV=1	7826.54	8990.96	0	0
B8MM77	1	1	Infinity	PJC	PJG	61764.7	Purine permease_ putative OS=Talaromyces stipitatus (strain ATCC 10500 / CBS 375.48 / QM 6759 / NRRL 1006) OX=441959 GN=TSTA_098460 PE=4 SV=1	1013.18	1132.31	0	0
A0A0N0RZT8;A0A1V6PZ34	1	1	10715.6	PJC	PJG	61412.3	Fungal_trans domain-containing protein OS=Penicillium nordicum OX=229535 GN=ACN38_g1741 PE=4 SV=1	1801.6	1999.66	0.146991	0.207749
A0A0F7TNK0	1	1	14838.9	PJC	PJG	54123.4	Uncharacterized protein OS=Penicillium brasilianum OX=104259 GN=PMG11_05680 PE=4 SV=1	975.091	1056.95	0.0161771	0.120763
A0A0F7TP54;A0A1Q5UCC0;A0A1S9S1T2;S7ZGU9	1	1	Infinity	PJC	PJG	33972.7	Uncharacterized protein OS=Penicillium brasilianum OX=104259 GN=PMG11_02960 PE=4 SV=1	1583.78	1840.99	0	0
A0A093V3D6;A0A1Q5THY0;B6QI81	1	1	Infinity	PJG	PJC	65886.6	Glucoamylase OS=Talaromyces marneffei PM1 OX=1077442 GN=GQ26_0160970 PE=3 SV=1	0	0	236.791	211.038
A0A1Q5UKX2;A0A0F7VJX3;A0A1V6SJT6	2	2	3.17238	PJC	PJG	36258.5	Endo-chitosanase OS=Penicillium subrubescens OX=1316194 GN=PENSUB_1236 PE=3 SV=1	1346.73	1334.43	426.806	418.35
B8LTF8	3	3	10368.1	PJC	PJG	71617.6	Dipeptidyl peptidase IV_ putative OS=Talaromyces stipitatus (strain ATCC 10500 / CBS 375.48 / QM 6759 / NRRL 1006) OX=441959 GN=TSTA_064970 PE=4 SV=1	157150	162821	16.9233	13.9376
B8MGB4	1	1	Infinity	PJG	PJC	69801.1	C6 transcription factor_ putative OS=Talaromyces stipitatus (strain ATCC 10500 / CBS 375.48 / QM 6759 / NRRL 1006) OX=441959 GN=TSTA_013370 PE=4 SV=1	0	0	68.7327	76.4826
A0A1V6V0J6	2	2	73827.8	PJC	PJG	103842	Uncharacterized protein OS=Penicillium coprophilum OX=36646 GN=PENCOP_c002G03145 PE=4 SV=1	126801	131199	1.49228	2.00234
A0A0G4PWZ1	2	2	837.037	PJC	PJG	62200.9	Phosphate transporter OS=Penicillium camemberti FM 013 OX=1429867 GN=PCAMFM013_S057g000005 PE=3 SV=1	4542.7	4271.24	5.6996	4.83032
W6QDH0	1	1	4079.76	PJC	PJG	61888.2	Zn(2)-C6 fungal-type DNA-binding domain OS=Penicillium roqueforti (strain FM164) OX=1365484 GN=PROQFM164_S01g001458 PE=4 SV=1	6944.17	8371.12	1.72738	2.02658
W6PTR4	1	1	20005.7	PJC	PJG	76524	Acetoacetyl-CoA synthase OS=Penicillium roqueforti (strain FM164) OX=1365484 GN=PROQFM164_S01g000975 PE=4 SV=1	2543.89	2553.32	0.252227	0.00256039
A0A1V6TA46	1	1	33488.4	PJC	PJG	10420.6	Uncharacterized protein OS=Penicillium flavigenum OX=254877 GN=PENFLA_c012G05911 PE=4 SV=1	3473.59	4114.97	0	0.226603
K9G0W3;K9FDB1;K9FVQ7;K9GC76	3	2	297.749	PJC	PJG	21667.5	HTH CENPB-type domain-containing protein OS=Penicillium digitatum (strain PHI26 / CECT 20796) OX=1170229 GN=PDIG_28900 PE=4 SV=1	6026.68	6844.63	23.2982	19.9306
S7ZQC9	4	3	14.1858	PJC	PJG	205235	Uncharacterized protein OS=Penicillium oxalicum (strain 114-2 / CGMCC 5302) OX=933388 GN=PDE_07891 PE=4 SV=1	9578.31	10175.2	726.21	666.276
A0A0A2L603	3	2	10.8351	PJC	PJG	209032	Helicase_ C-terminal OS=Penicillium italicum OX=40296 GN=PITC_082440 PE=4 SV=1	89129.7	82998.4	7678.19	8207.93
Q06886	12	4	23487.1	PJC	PJG	57877	Exoglucanase 1 OS=Penicillium janthinellum OX=5079 GN=cbh1 PE=2 SV=1	344039	346375	17.8206	11.5749
A0A0F7TSC9;A0A1Q5UH83;A0A1S9RT40;A0A2H3J2E4;B8LZT2;G9DBG4	2	2	426.154	PJC	PJG	51394	Glucanase OS=Penicillium brasilianum OX=104259 GN=PMG11_06607 PE=3 SV=1	13991.7	11219.9	32.4876	26.673
A0A2H3IHI9	2	2	1320.81	PJC	PJG	38745.2	Uncharacterized protein OS=Penicillium sp. 'occitanis' OX=290292 GN=PENO1_090540 PE=4 SV=1	3918.23	4040.92	3.59232	2.43363
A0A1V6SPB5;A0A2H3IFK0;B8M856	1	1	15.601	PJG	PJC	83835.9	Uncharacterized protein OS=Penicillium steckii OX=303698 GN=PENSTE_c028G08968 PE=4 SV=1	23.2481	22.6213	389.722	325.886
A0A1Q5UIA5;A0A088STL5;A0A0A2LID0;A0A0G4NWG3;A0A0G4PHA5;A0A117NLW4;A0A135L9H9;A0A135LXP4;A0A1V6UHP5;W6PXL5	6	4	20979.7	PJC	PJG	78177.9	Glucanase OS=Penicillium subrubescens OX=1316194 GN=PENSUB_2329 PE=3 SV=1	7309.05	6523.67	0.659339	0
A0A1V6R394	2	1	1.78608	PJC	PJG	60514.9	Condensation domain-containing protein OS=Penicillium solitum OX=60172 GN=PENSOL_c018G01093 PE=4 SV=1	89078.8	86038.8	48233.1	49812.6
A0A1V6PVF6	3	3	2.28227	PJC	PJG	33822.5	S-methyl-5'-thioadenosine phosphorylase OS=Penicillium antarcticum OX=416450 GN=PENANT_c030G09407 PE=3 SV=1	94561.3	94410.8	42820.8	39979.4
A0A1Q5UIH7;A0A088S9G7;A0A0A2JQK5;A0A0F7TT43;A0A101MFU7;A0A1S9RU93;A0A1V6N644;H9TUB0;K9FWI1;K9GSU4;S7ZX22	3	3	86.2887	PJC	PJG	65253.4	Endoglucanase B OS=Penicillium subrubescens OX=1316194 GN=PENSUB_1985 PE=3 SV=1	1205.73	1307.17	17.301	11.821
A0A1S9RZR9;A0A0F7TWR3	3	3	23.0887	PJC	PJG	143135	Lipid A export ATP-binding/permease protein msbA OS=Penicillium brasilianum OX=104259 GN=PEBR_02635 PE=4 SV=1	4550.06	4980.3	234.031	178.74
B8MG06	1	1	40.6372	PJC	PJG	80577.7	Uncharacterized protein OS=Talaromyces stipitatus (strain ATCC 10500 / CBS 375.48 / QM 6759 / NRRL 1006) OX=441959 GN=TSTA_009910 PE=4 SV=1	826.684	825.042	16.9285	23.7172
A0A1Q5UPK8;A0A0F7TUC2;A0A1B1MQM8;A0A1S9RYE7;S8B0B4	5	5	64.5592	PJC	PJG	38636.6	Uncharacterized protein OS=Penicillium subrubescens OX=1316194 GN=PENSUB_14178 PE=3 SV=1	4239.99	3022.93	61.1857	51.3145
A0A093V670;A0A0A2IL19;A0A0A2KKJ9;A0A0F7U3Z6;A0A0G4PS76;A0A0M8PDT1;A0A0U1LTI1;A0A117NKA2;A0A135LN00;A0A167QIU1;A0A1F5LW18;A0A1Q5UAD4;A0A1S9REU8;A0A1V6NLL5;A0A1V6P748;A0A1V6PU96;A0A1V6RBV4;A0A1V6SDD1;A0A1V6SMU8;A0A1V6TJA2;A0A1V6UP83;A0A1V6XNB7;B6GZF2;B6QHT9;B8MIM8;K9FUJ8;K9GDI2;S7ZTZ1;W6R1D9	1	1	12.4486	PJC	PJG	108086	Long chain acyl-CoA synthetase 7_ peroxisomal OS=Talaromyces marneffei PM1 OX=1077442 GN=GQ26_0470430 PE=4 SV=1	5070.74	5331.42	369.622	465.985
B8MED7	2	2	112.937	PJC	PJG	21275.4	Uncharacterized protein OS=Talaromyces stipitatus (strain ATCC 10500 / CBS 375.48 / QM 6759 / NRRL 1006) OX=441959 GN=TSTA_016420 PE=3 SV=1	2662.67	2270.76	26.6521	17.031
A0A1Q5UEG0	3	3	698.304	PJC	PJG	50398.5	Uncharacterized protein OS=Penicillium subrubescens OX=1316194 GN=PENSUB_3678 PE=4 SV=1	4988.35	9502.02	11.0829	9.66787
A0A117NS52	3	3	2.61852	PJC	PJG	231444	Uncharacterized protein OS=Penicillium freii OX=48697 GN=ACN42_g631 PE=4 SV=1	21084.2	20354.8	7520.68	8304.71
A0A1V6SXC4	4	4	2.3255	PJC	PJG	140726	HECT domain-containing protein OS=Penicillium steckii OX=303698 GN=PENSTE_c018G08715 PE=4 SV=1	9819.67	9444.46	4324.3	3959.56
S8AMY9	2	2	1.83445	PJC	PJG	13386.1	Uncharacterized protein OS=Penicillium oxalicum (strain 114-2 / CGMCC 5302) OX=933388 GN=PDE_02206 PE=4 SV=1	104248	103436	58577.3	54635.5
A0A088S933;A0A1Q5UEK4;S8AP92;A0A2H3IGC2;B8MEX2	2	1	40.1124	PJC	PJG	30033.9	Endo-1_4-beta-xylanase OS=Penicillium oxalicum OX=69781 PE=3 SV=1	782.103	884.486	25.0219	16.5261
A0A1S9S0X0	2	1	2710.11	PJC	PJG	86566.7	Uncharacterized protein OS=Penicillium brasilianum OX=104259 GN=PEBR_01371 PE=4 SV=1	1500.79	1623.11	1.15268	0
S7ZCW4	2	2	24.2808	PJC	PJG	54148.4	Putative exo-beta-1_3-galactanase OS=Penicillium oxalicum (strain 114-2 / CGMCC 5302) OX=933388 GN=PDE_01468 PE=3 SV=1	1968.97	1832.27	60.2008	96.3528
A0A1Q5SW99;S7ZL65;U3N1Q2	2	2	77.3954	PJC	PJG	47620.1	CBM1 domain-containing protein OS=Penicillium subrubescens OX=1316194 GN=PENSUB_12792 PE=3 SV=1	1933.23	1849.29	32.3069	16.5657
A0A0A2LET0	2	2	1.82954	PJC	PJG	139121	Helicase_ C-terminal OS=Penicillium italicum OX=40296 GN=PITC_068970 PE=4 SV=1	109784	113299	64012.2	57921.3
S8BDR6	4	4	8.40443	PJG	PJC	85802.8	Putative exo-beta-1_3-glucanase OS=Penicillium oxalicum (strain 114-2 / CGMCC 5302) OX=933388 GN=PDE_08139 PE=4 SV=1	11.4821	16.3922	129.556	104.711
A0A101MJY6	3	3	1.74988	PJC	PJG	83269.3	Zn(2)-C6 fungal-type domain-containing protein OS=Penicillium freii OX=48697 GN=ACN42_g5130 PE=4 SV=1	52023.5	53320.3	31755.8	28444.9
W6PR66	3	3	3829.81	PJC	PJG	136007	Genomic scaffold_ ProqFM164S01 OS=Penicillium roqueforti (strain FM164) OX=1365484 GN=PROQFM164_S01g000497 PE=4 SV=1	13892.2	1880.92	1.7249	2.39362
A0A0M8P9R6	1	1	413.097	PJG	PJC	125967	Uncharacterized protein OS=Penicillium nordicum OX=229535 GN=ACN38_g5454 PE=4 SV=1	0	2.75758	605.233	533.917
A0A0U1LTN4	4	4	2.75042	PJG	PJC	120037	Rieske domain-containing protein OS=Talaromyces islandicus OX=28573 GN=PISL3812_03478 PE=4 SV=1	339.367	231.651	773.415	797.123
P34946;A0A093UTW7;A0A0F7TSG9;A0A1S9RJ67;B6QNU3;S8B8I9	3	3	10.0974	PJG	PJC	47009.4	Carboxypeptidase S1 OS=Penicillium janthinellum OX=5079 PE=1 SV=1	130.244	53.7588	998.037	859.922
A0A1F5LP53;A0A1V6QPN9	5	5	6.39869	PJG	PJC	165501	Uncharacterized protein OS=Penicillium arizonense OX=1835702 GN=PENARI_c005G06885 PE=4 SV=1	38.6058	18.5891	165.649	200.324
A0A0A2KY62	2	2	49.9152	PJC	PJG	96664.4	Transcription factor_ fungi OS=Penicillium italicum OX=40296 GN=PITC_057430 PE=4 SV=1	388.738	1661.15	23.719	17.3484
A0A1V6Q038	2	2	198.051	PJC	PJG	54074.1	FAD_binding_3 domain-containing protein OS=Penicillium antarcticum OX=416450 GN=PENANT_c021G02786 PE=4 SV=1	2546.15	18269.6	69.5112	35.5916
F1CHI2;A0A0S2N096;S7ZP52	5	3	20734.9	PJC	PJG	49185.5	Glucanase OS=Penicillium decumbens OX=69771 GN=CBHII PE=3 SV=1	9643.13	335.157	0.371695	0.109537
A0A0U1M7Y3	4	4	1.29368	PJC	PJG	150251	Ankyrin repeat domain-containing protein 50 OS=Talaromyces islandicus OX=28573 GN=PISL3812_08740 PE=4 SV=1	24936.6	25234.3	20505	18276.6
A0A093XNA3;A0A2H3IK21;B6QDN6;A0A093V9P8;B8MCW7	2	2	65.3476	PJG	PJC	35702.3	Putative GTP cyclohydrolase 1 type 2 (Fragment) OS=Talaromyces marneffei PM1 OX=1077442 GN=GQ26_0170090 PE=4 SV=1	0	1.45276	20.3861	74.5479
W6R0R3	1	1	33.8365	PJG	PJC	140255	AMP-dependent synthetase/ligase OS=Penicillium roqueforti (strain FM164) OX=1365484 GN=PROQFM164_S04g000303 PE=4 SV=1	3.19842	3.28597	39.4828	179.926
K9G2V1;K9GBD1	5	5	1.37033	PJG	PJC	192028	Kinesin family protein OS=Penicillium digitatum (strain PHI26 / CECT 20796) OX=1170229 GN=PDIG_24530 PE=3 SV=1	12668.7	12231.6	18317.7	15804
A0A2H3IHX4	3	3	20.3099	PJG	PJC	101090	Glycoside hydrolase_ family 2_ immunoglobulin-like beta-sandwich OS=Penicillium sp. 'occitanis' OX=290292 GN=PENO1_069040 PE=4 SV=1	3.70727	20.0233	254.151	227.813
A0A0F7TWI9	1	1	33.1793	PJG	PJC	72023.8	Putative Ankyrin repeat protein OS=Penicillium brasilianum OX=104259 GN=PMG11_08879 PE=4 SV=1	12.2186	0	187.851	217.553
B8LUC7	2	2	2.39038	PJG	PJC	125517	DDENN domain protein OS=Talaromyces stipitatus (strain ATCC 10500 / CBS 375.48 / QM 6759 / NRRL 1006) OX=441959 GN=TSTA_071030 PE=4 SV=1	145.657	71.6978	222.725	296.837
A0A135LTT6	5	3	23974.5	PJC	PJG	135556	Tetratricopeptide-like helical OS=Penicillium patulum OX=5078 GN=PGRI_086780 PE=4 SV=1	24.4486	13073.5	0.345743	0.200583
A0A1V6YUI3	2	2	5.40321	PJG	PJC	107734	Amidohydro-rel domain-containing protein OS=Penicillium nalgiovense OX=60175 GN=PENNAL_c0010G11475 PE=4 SV=1	75.6952	7.55844	225.209	224.628
A0A2H3HY35	2	2	5.83803	PJG	PJC	65071.6	Uncharacterized protein OS=Penicillium sp. 'occitanis' OX=290292 GN=PENO1_107740 PE=4 SV=1	163.936	8.38706	495.213	510.815
B8M4W8	1	1	2.02121	PJG	PJC	118330	Phosphatidylserine decarboxylase proenzyme 2 OS=Talaromyces stipitatus (strain ATCC 10500 / CBS 375.48 / QM 6759 / NRRL 1006) OX=441959 GN=PSD2 PE=3 SV=1	86.402	152.276	322.741	159.676
A0A0A2K574	1	1	99.5491	PJC	PJG	44050.5	HSP20-like chaperone OS=Penicillium expansum OX=27334 GN=PEX2_013660 PE=3 SV=1	14.7087	1184.65	5.66382	6.38408
A0A1V6RAD8	4	4	1.82606	PJG	PJC	128631	Uncharacterized protein OS=Penicillium vulpinum OX=29845 GN=PENVUL_c075G10012 PE=4 SV=1	266.418	72.2907	322.563	295.941
A0A0A2LEG0	2	2	1.08786	PJC	PJG	145579	Uds1 domain-containing protein OS=Penicillium italicum OX=40296 GN=PITC_068020 PE=4 SV=1	258.648	221.537	231.174	210.232
A0A0A2JAN7;A0A0A2L865;A0A0G4PAS5;A0A0M9WE70;A0A117NNJ8;A0A167Y947;A0A1V6NJA9;A0A1V6RLL4;A0A1V6SL81;B6H981;K9GDL5;K9GDU2;A0A1V6SCE1;A0A1V6UKE7;A0A1V6YBV6;A0A135LX46;W6PWN6;A0A1Q5UPU6;A0A0U1M4A0	6	6	1.07221	PJG	PJC	182590	Zinc finger_ PHD-type OS=Penicillium expansum OX=27334 GN=PEX2_110610 PE=4 SV=1	1652.1	1871.06	2021.36	1756.23
S7ZNU5	3	3	2.94348	PJC	PJG	72352.7	Putative bifunctional alpha-glucuronidase/N-acetyl beta-glucosaminidase OS=Penicillium oxalicum (strain 114-2 / CGMCC 5302) OX=933388 GN=PDE_07013 PE=4 SV=1	2895.53	249.817	545.921	522.662
A0A101MGH2	2	1	36.8022	PJC	PJG	57215.3	Uncharacterized protein OS=Penicillium freii OX=48697 GN=ACN42_g7206 PE=4 SV=1	4.73216	6245.78	77.8213	92.0195
A0A0F7TQ87;A0A1S9RUG0	5	0		---	---	58611.3	Putative Cellobiohydrolase OS=Penicillium brasilianum OX=104259 GN=PMG11_06626 PE=4 SV=1
A0A0F7TT91;A0A1S9RJV1	3	0		---	---	49527.7	Glucanase OS=Penicillium brasilianum OX=104259 GN=PMG11_07639 PE=3 SV=1
A0A1F5LUH2;A0A1V6PQN7;W6QL66	2	0		---	---	41523.1	Glucanase OS=Penicillium arizonense OX=1835702 GN=PENARI_c003G12252 PE=3 SV=1
